# Supplementary material for: Anti-bacterial, anti-biofilm and synergistic effects of phenazine-based ruthenium(ii) complexes
Source: Royal Society of Chemistry journal article supplement (doi:10.1039/d4dt01033g), 2024-01-01
Supplement: d4dt01033g1.pdf [file d4dt01033g1.pdf]

## Supporting Information

### **Anti-bacterial, Anti-biofilm and Synergist Effects of Phenazinic-Based Ruthenium(II) Complexes**

Patrícia H. R. Martins,<sup>1</sup> Adolfo I. B. Romo,<sup>2</sup> Florencio S. G. Júnior,<sup>1</sup> Iury A. Paz,<sup>3</sup> Nilberto R. F. Nascimento,<sup>3</sup> Alexandre L. Andrade,<sup>4</sup> Joaquín Rodríguez-López,<sup>2</sup> Mayron A. de Vasconcelos<sup>5</sup>, Edson Holanda Teixeira<sup>4</sup>, Carlos André Ferreira Moraes,<sup>6</sup> Luiz G. F. Lopes<sup>1\*</sup>, Eduardo Henrique Silva Sousa<sup>1\*</sup>

<sup>1</sup>Bioinorganic Group, Department of Organic and Inorganic Chemistry, Federal University of Ceará, Fortaleza, Ceará, Brazil, 60451-970.

<sup>2</sup>Department of Chemistry, University of Illinois at Urbana–Champaign, Urbana, Illinois, USA, 61801.

<sup>3</sup>Laboratory of Cardiovascular and Renal Physiology and Pharmacology (LAFCAR), State University of Ceará (UECE), Fortaleza, Ceará, Brazil, 60714-903.

<sup>4</sup>Biomolecule Integrated Laboratory (LIBS), Federal University of Ceará, Fortaleza, Ceará, Brazil, 60451-970.

<sup>5</sup>Faculty of Education of Itapipoca (FACEDI), State University of Ceará (UECE), Itapipoca, Ceará, Brazil, 62500-000.

<sup>6</sup> Department of Chemistry, Federal University of São Carlos (UFSCar), São Carlos, São Paulo, Brazil, 13565-905

\*Corresponding authors: [eduardohss@dqoi.ufc.br](mailto:eduardohss@dqoi.ufc.br) and [lopeslu@dqoi.ufc.br](mailto:lopeslu@dqoi.ufc.br)

**Note 1:** **PR** metal complex was characterized by FTIR spectrum that showed bands consistent with aromatic-based polypyridinic ligands with stretching of C-H and C=C bonds at 3064-2929  $\text{cm}^{-1}$  and 1486  $\text{cm}^{-1}$ , respectively (Figure S1). In addition, this compound exhibited a metal-to-ligand charge-transfer with maximum at 504 nm (MLCT band) noticed in similar systems containing a Ru(II) metal center (Figure S2). Cyclic voltammetry showed a reversible electrochemical process at  $E_{1/2} = 0.52\text{V}$  vs Ag|AgCl consistent to a  $\text{Ru}^{\text{III/II}}$  process (Figure S3).

**Note 2:** **PR01** was also investigated by FTIR analysis that showed a nitrogen bound nitrite ligand with symmetric and asymmetric stretching  $\nu(\text{NO}_2^-)$  at 1333-1353  $\text{cm}^{-1}$  and also a typical sulfur bonded sulfite stretching mode  $\nu(\text{SO}_3^-)$  at 1139  $\text{cm}^{-1}$ . This profile is in agreement with theoretical measurements and analogous ruthenium complexes (e.g., *cis*- $[\text{Ru}(\text{bpy})_2(\text{SO}_3)(\text{NO})](\text{PF}_6)$ ).<sup>1, 2</sup> Electronic spectra in the UV-vis region for this metal complex showed a MLCT band with maximum at 405 nm in DMSO.

**Note 3:** For **PR02**, its stretching mode value for  $\text{NO}^+$  was remarkably close to the ones (Figure S7) in *cis*- $[\text{Ru}(\text{bpy})_2(\text{SO}_3)(\text{NO})](\text{PF}_6)$  (at 1911  $\text{cm}^{-1}$ )<sup>1</sup> and *cis*- $[\text{Ru}(\text{phen})_2(\text{SO}_3)(\text{NO})](\text{PF}_6)$  (at 1913  $\text{cm}^{-1}$ )<sup>3</sup>, even though a phenazinic ligand (dppz) was used instead. On the other hand, different monodentate ligands (L) bound to a *cis*- $[\text{Ru}(\text{bpy})_2(\text{L})(\text{NO})]$  moiety can more expressively alter  $\nu(\text{NO}^+)$ . For example,  $\nu(\text{NO}^+)$  for *cis*- $[\text{Ru}(\text{bpy})_2(\text{L})(\text{NO})]$  was found at 1930, 1940, 1948 when using  $\text{L} =$  ethylenethiourea, 2-methylimidazole or isonicotinamide, respectively.<sup>1, 4</sup> These data would suggest that monodentated *cis*-ligand may cause a major disturbance on bound NO, but this is not completely true since other properties were expressively affected by using distinct bidentated polypyridinic ligands as further described for

**PR02.** These monodentate ligands could influence NO not only through an overall change in the electronic distribution but also through direct interactions due to proximity. Thus, a combination of effects may be responsible for the overall kinetic and thermodynamic properties of this type of ruthenium nitrosyl compound.

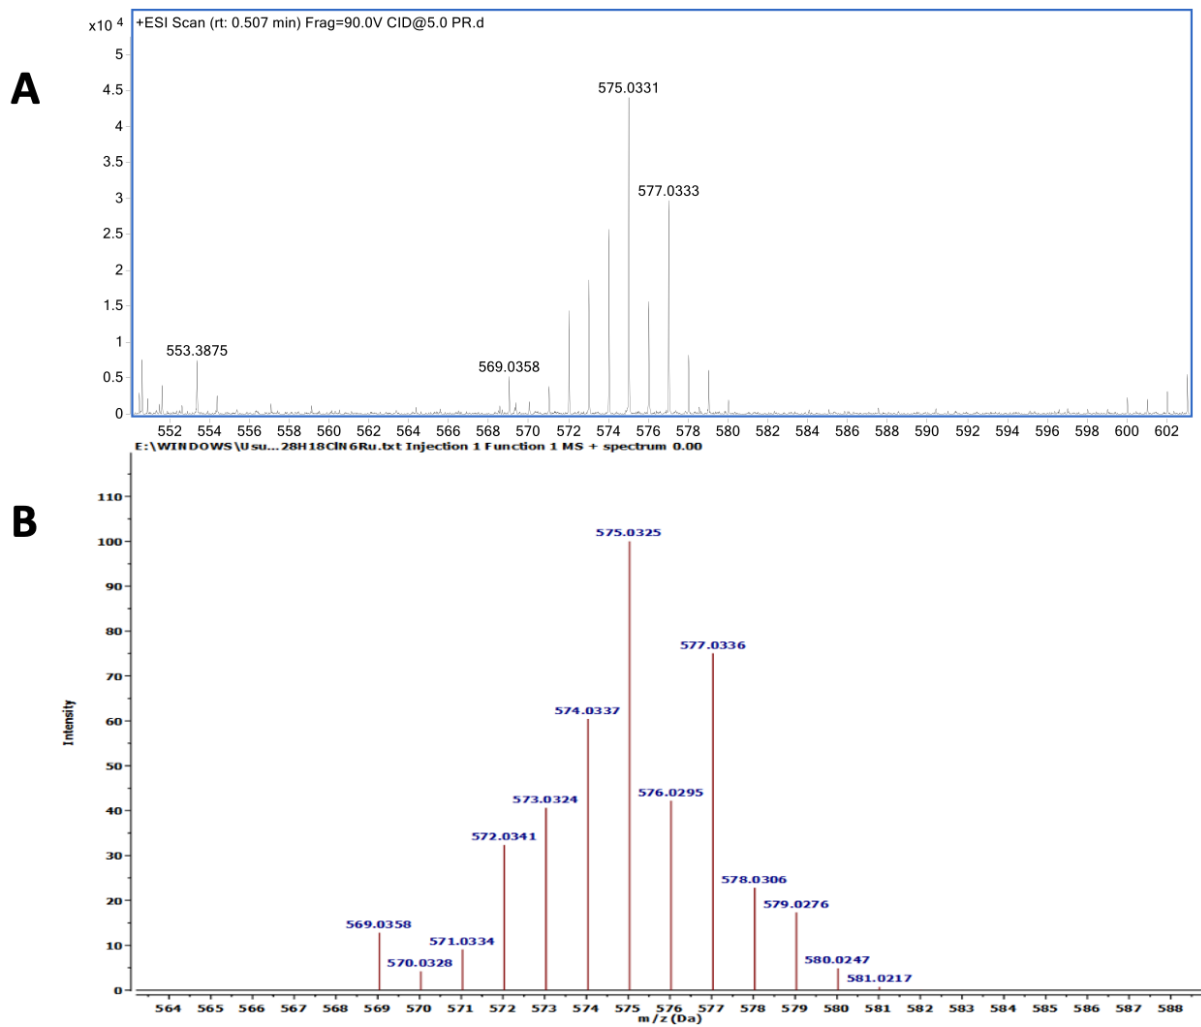

**Figure S1.** High-resolution mass spectrometry of **PR** in 1:1 methanol:acetonitrile, experimental (A) and calculated (B).

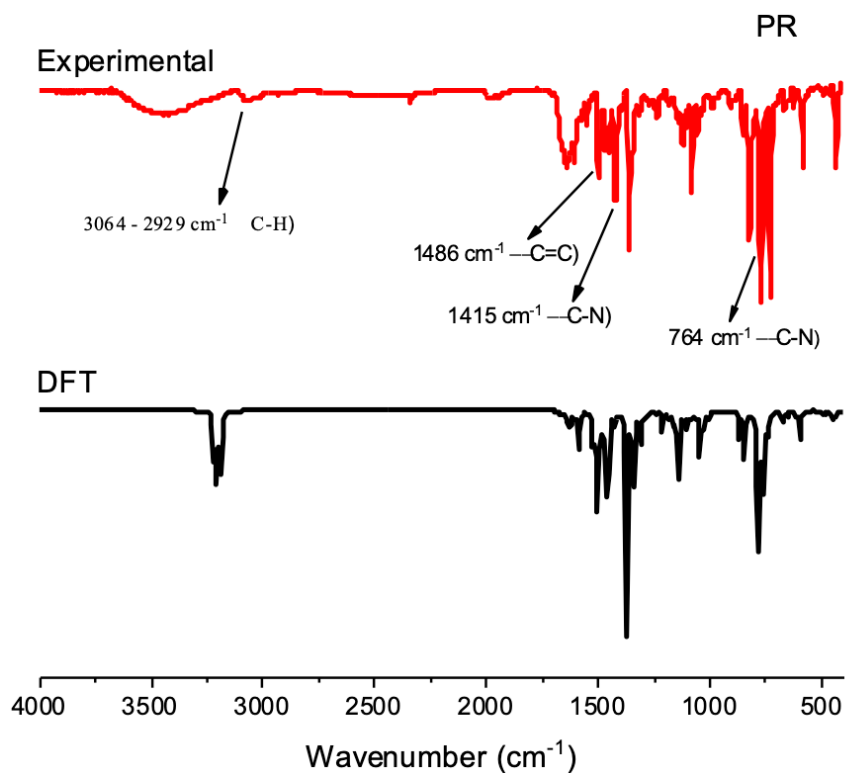

**Figure S2.** DFT-simulated (black) and experimental (red) FTIR spectra of **PR** complex in a KBr pellets.

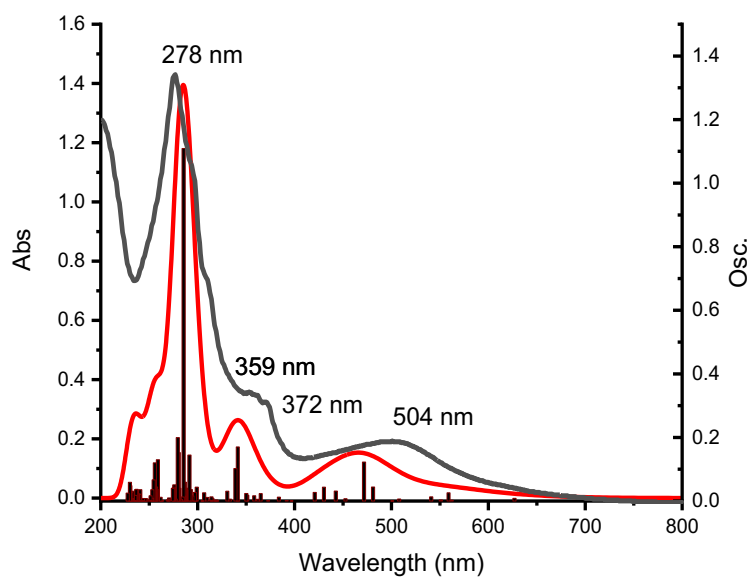

**Figure S3.** DFT-simulated (red) and experimental (gray) electronic spectra of **PR** in DMSO.

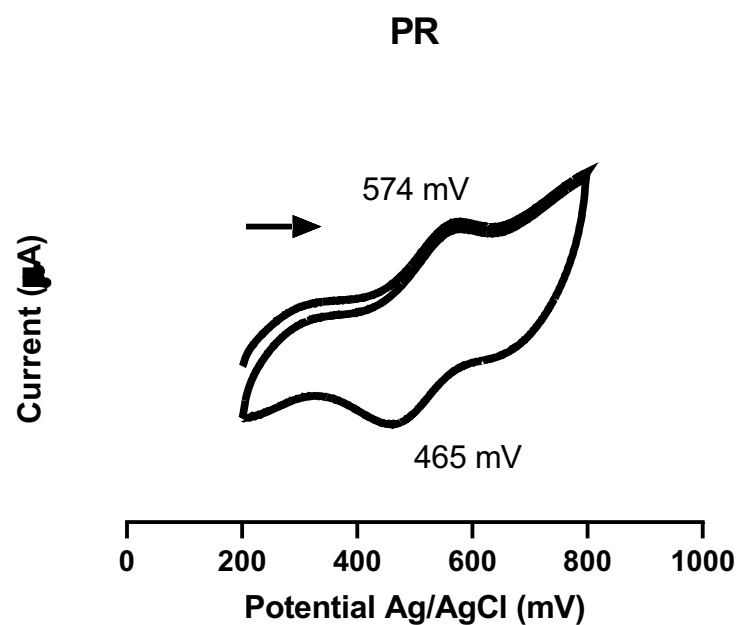

**Figure S4** – Cyclic voltammogram of a DMF solution containing  $2.0 \times 10^{-6} \text{ mol L}^{-1}$  of **PR** complex and  $0.1 \text{ mol L}^{-1}$  of PTBA. Measurement performed at  $100 \text{ mVs}^{-1}$ , and glassy carbon, platinum and Ag/AgCl electrode as working, counter and reference electrodes, respectively.

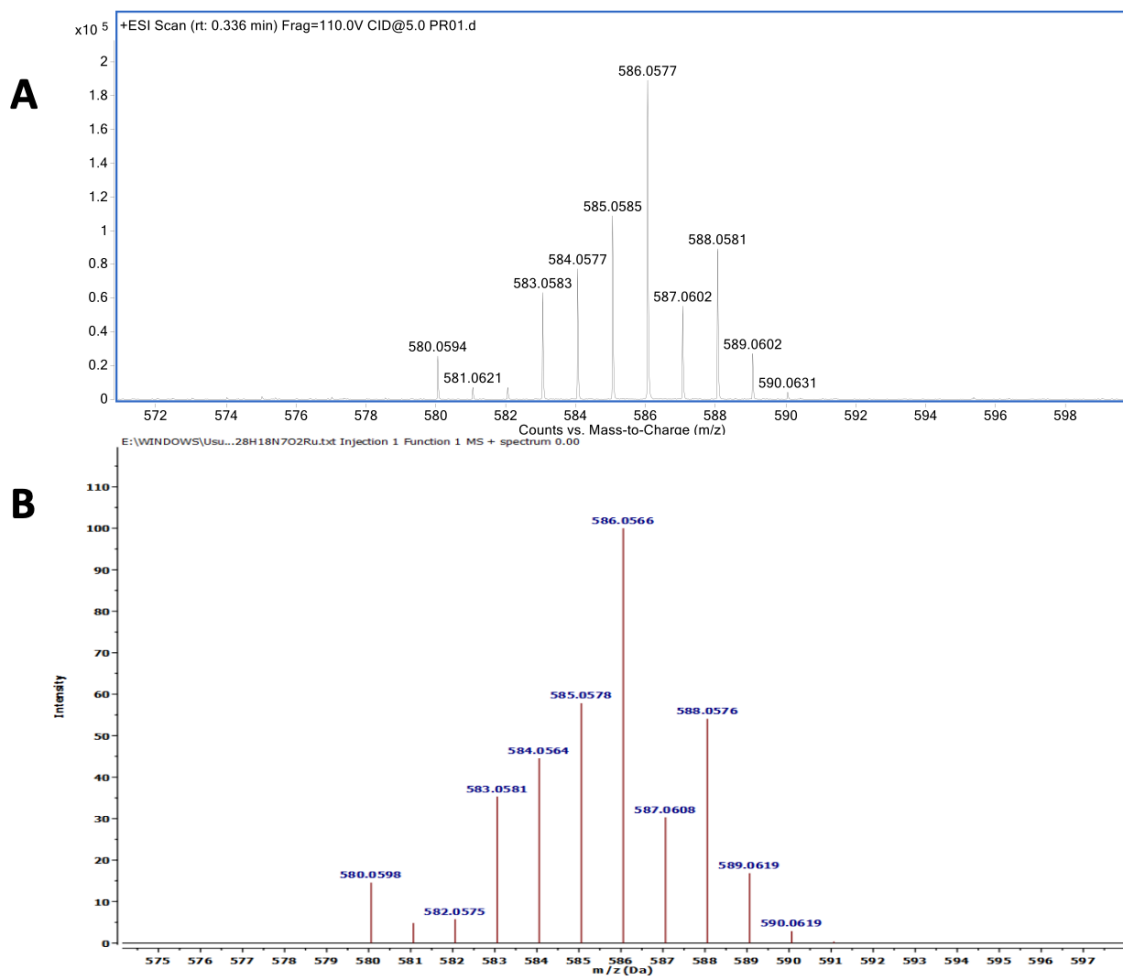

**Figure S5.** High-resolution mass spectrometry of **PR01** in 1:1 methanol:acetonitrile, experimental (A) and calculated (B).

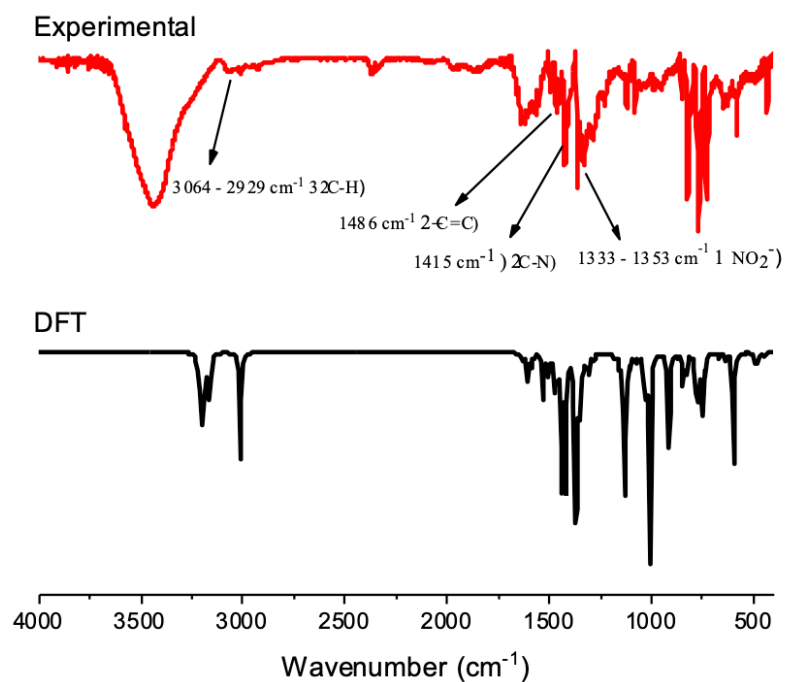

**Figure S6.** Infrared spectra simulated (black) and experimental (red) of a KBr pellets containing **PR01** complex.

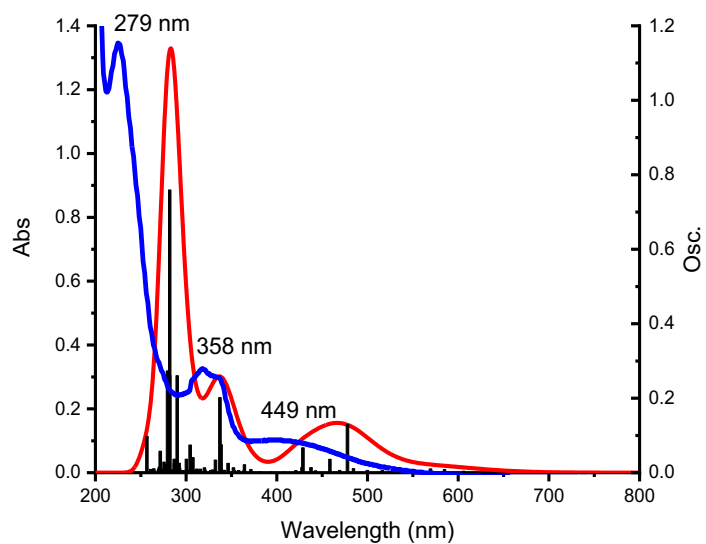

**Figure S7.** Simulated (red) and experimental (blue) electronic spectra of a DMSO solution containing  $4.0 \times 10^{-6} \text{ mol L}^{-1}$  of **PR01** complex.



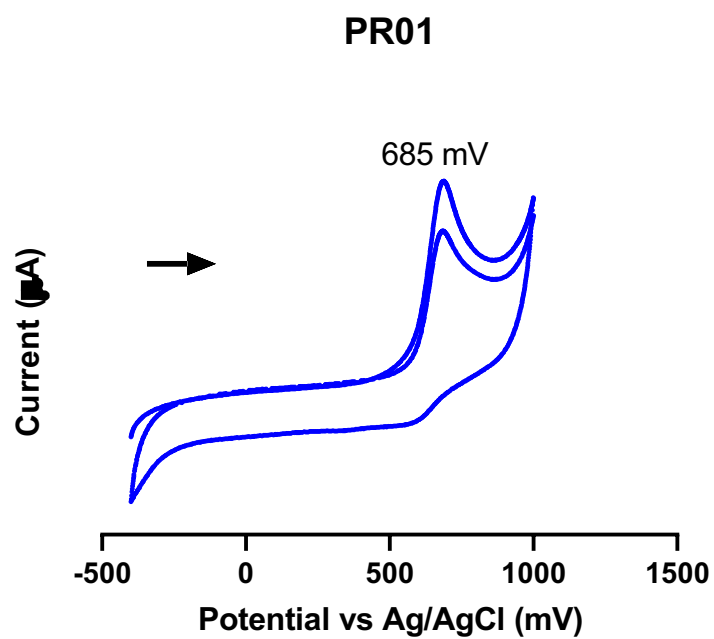

**Figure S8.** Cyclic voltammogram of a NaTFA  $0.1 \text{ mol L}^{-1}$  pH 4.0 aqueous solution containing  $2.0 \times 10^{-6} \text{ mol L}^{-1}$  of **PR01** complex and  $0.1 \text{ mol L}^{-1}$  of PTBA. Measurement performed at  $25 \text{ mV s}^{-1}$ , used glassy carbon, platinum and Ag/AgCl electrodes as working, counter and reference electrodes, respectively.

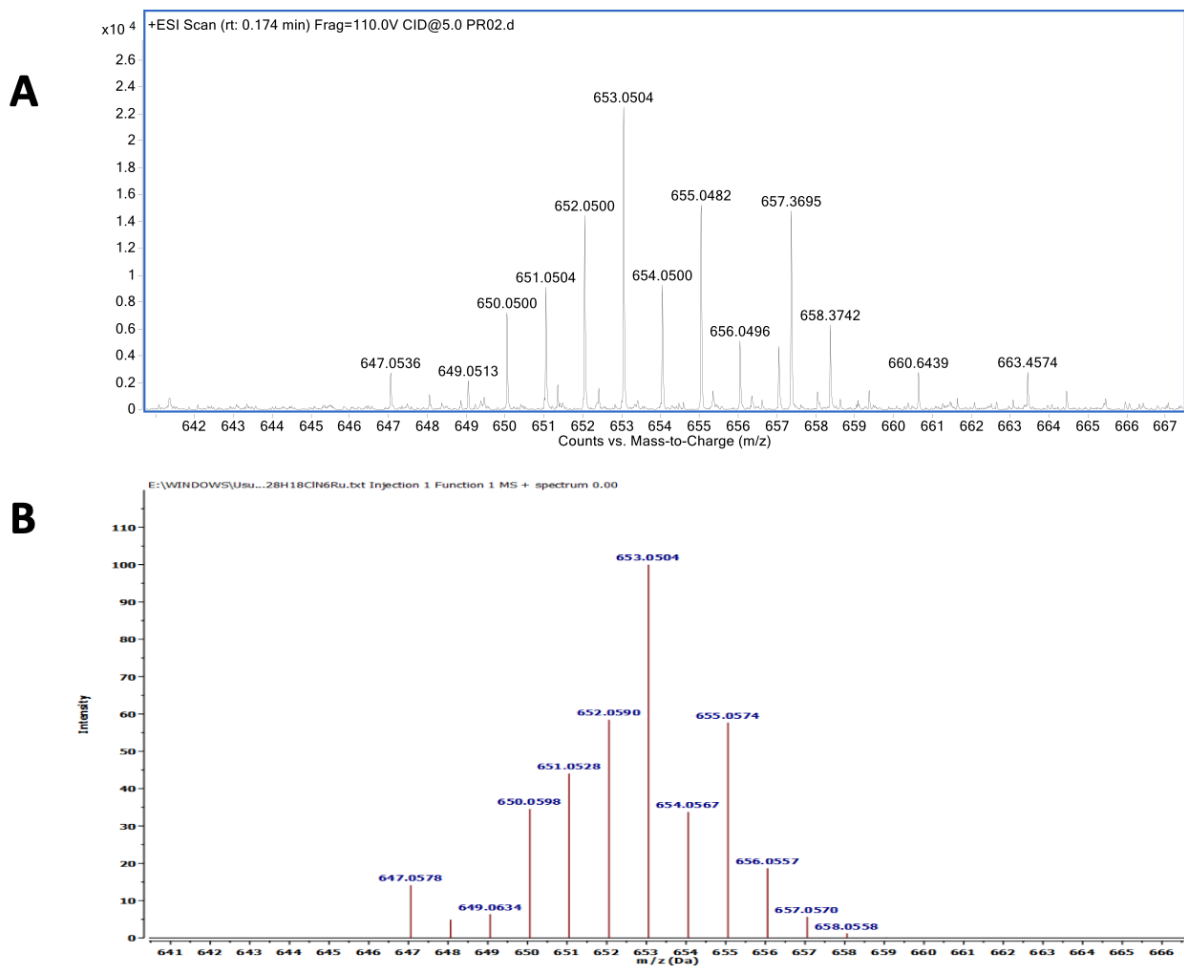

**Figure S9.** High-resolution mass spectrometry of **PR02** in 1:1 methanol:acetonitrile, experimental (A) and calculated (B).

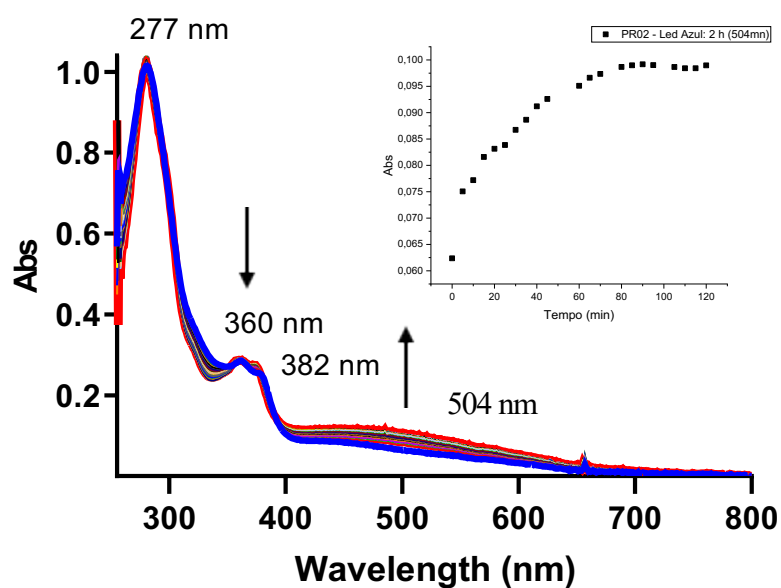

**Figure S10.** Kinetic study of the **PR02** at  $17 \mu\text{mol L}^{-1}$  in  $0.1 \text{ mol L}^{-1}$  of phosphate buffer, pH 7.4, in the presence of  $5 \text{ mmol L}^{-1}$  of glutathione for 2 h at  $37^\circ\text{C}$ .

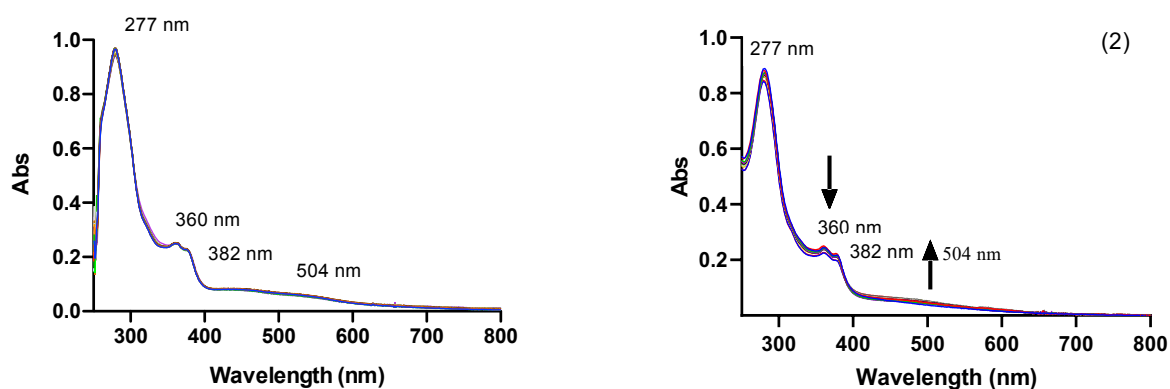

**Figure S11.** Kinetic study of the **PR02** complex at  $20 \mu\text{mol L}^{-1}$  in phosphate buffer  $0.1 \text{ mol L}^{-1}$  pH 7.4 in 5% DMSO with (left image) and without light (right image), monitored for 2h.

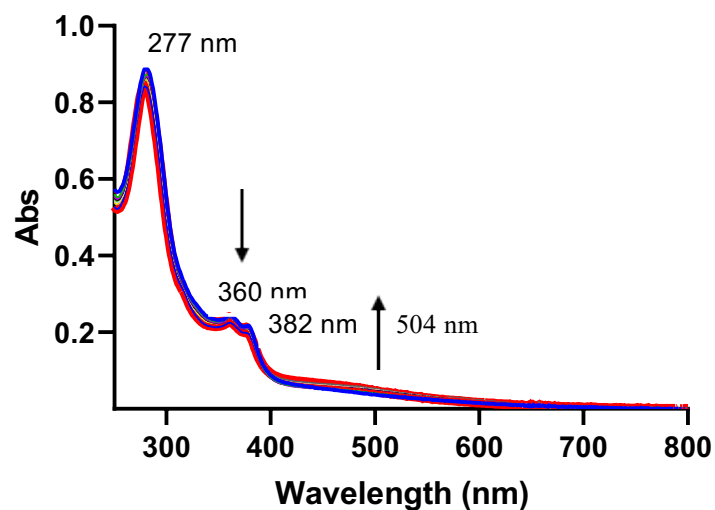

**Figure S12.** Kinetic study of the **PR02** complex at  $20 \mu\text{mol L}^{-1}$  in NaTFA  $0.1 \text{ mol L}^{-1}$  at pH 1.6 irradiated for 2 h with blue LED.

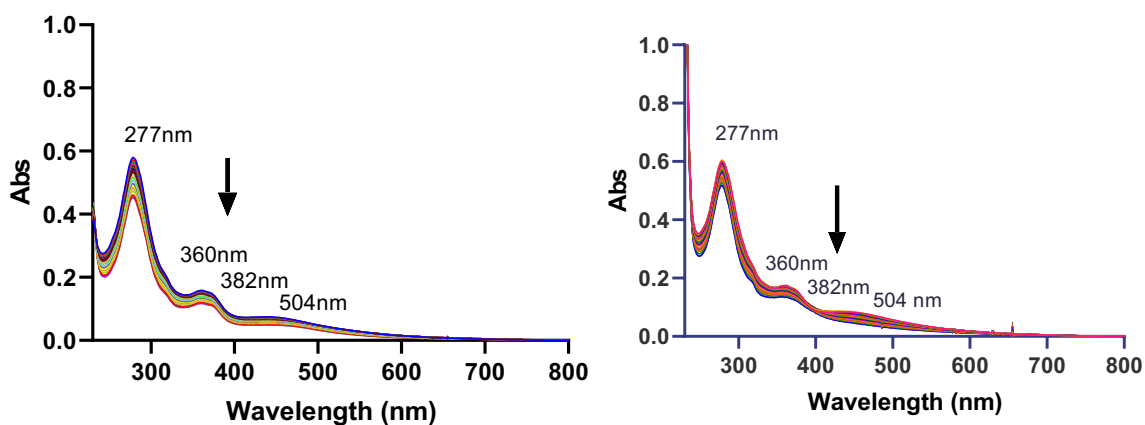

**Figure S13.** Thermal stability study of **PR02** at  $8.5 \mu\text{mol L}^{-1}$  in  $0.1 \text{ mol L}^{-1}$  of phosphate buffer pH 7.4 and 5% DMSO without (left image) and with (right image) blue LED irradiation ( $\lambda_{\text{max}} = 463 \text{ nm}$ ) for 720 min (12h) at  $37^\circ\text{C}$  (2).

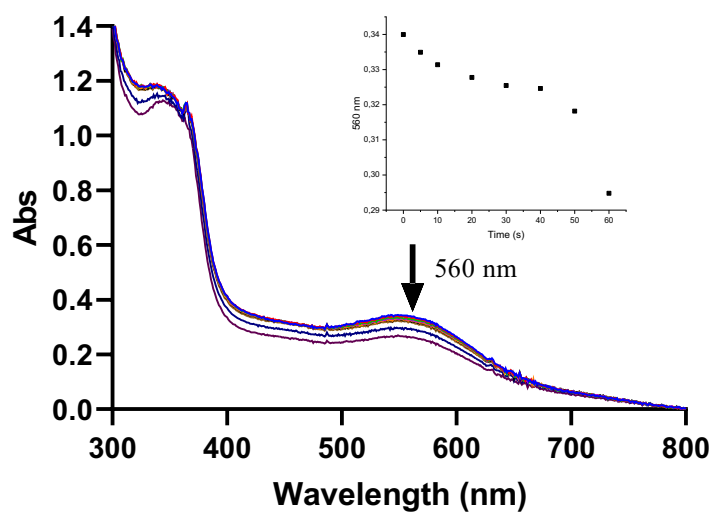

**Figure S14.** Study of NO/HNO release monitored by the reaction of **PR02** at  $100 \mu\text{mol L}^{-1}$  with  $190 \mu\text{mol L}^{-1}$  of cPTIO, in  $0.1 \text{ mol L}^{-1}$  of phosphate buffer pH 7.4. Inset: Monitoring absorbance changes over time up to 60 min, then added glutathione.

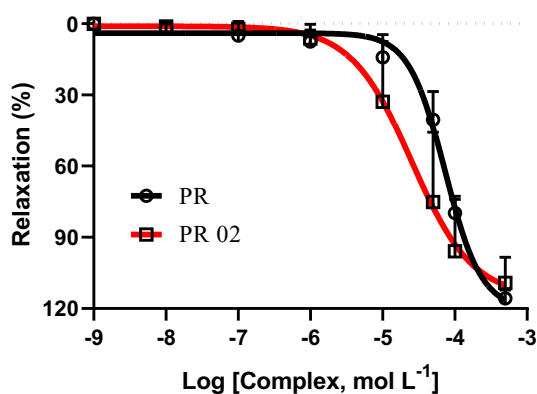

| Ru complex                                                                             | EC <sub>50</sub> ( $\mu\text{mol L}^{-1}$ ) |
|----------------------------------------------------------------------------------------|---------------------------------------------|
| <i>cis</i> -[Ru(bpy) <sub>2</sub> (SO <sub>3</sub> )NO](PF <sub>6</sub> ) <sub>3</sub> | 0.037                                       |
| PR                                                                                     | 73.0                                        |
| PR02                                                                                   | 25.0                                        |

**Figure S15.** Dose-response curves for vasodilation assay in rat aorta using **PR** and **PR02** complexes. Relaxation responses are expressed as percent relaxation versus complex concentration.

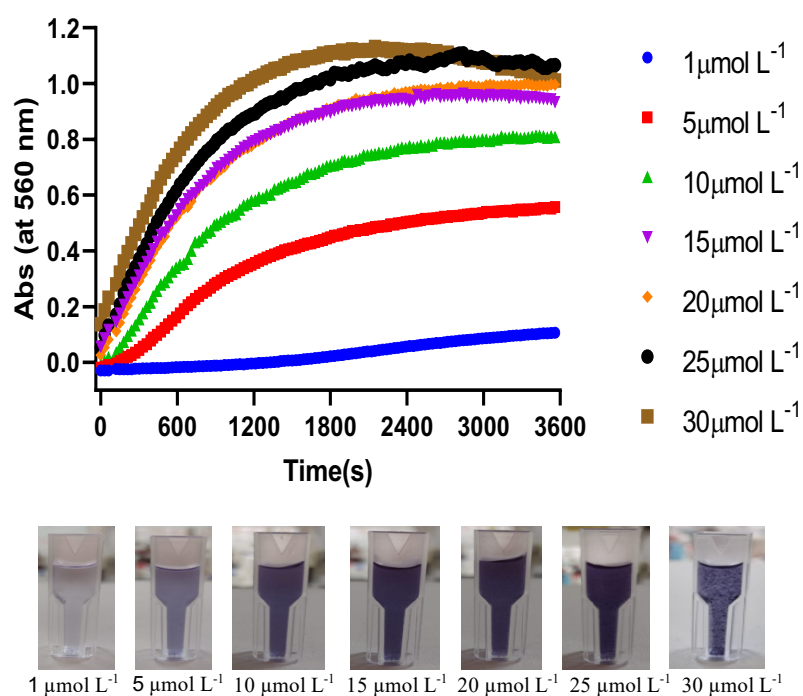

**Figure S16.** Kinetic curves corresponding to the spectral changes at 560 nm due to a reaction of PR02 at 1 up to 30  $\mu\text{mol L}^{-1}$  with 50  $\mu\text{mol L}^{-1}$  NBT and 1.5  $\text{mmol L}^{-1}$  glutathione (GSH), in 0.1  $\text{mol L}^{-1}$  phosphate buffer at pH 7.4, spectrum obtained every 30 s for 3600s.

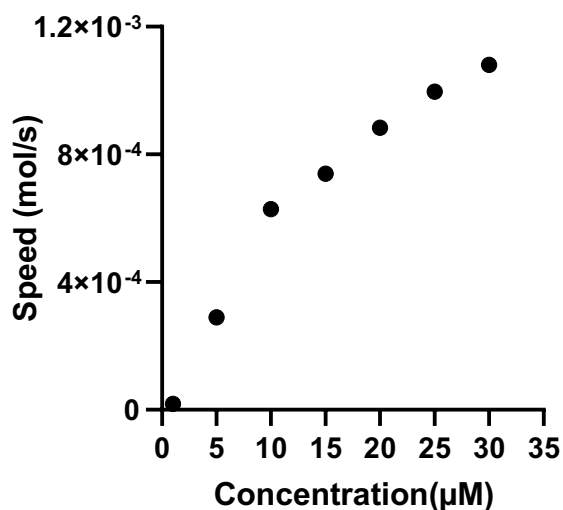

**Figure S17.** Superoxide generation in a dose dependent manner for PR02 in reaction with 1.5  $\text{mmol L}^{-1}$  of glutathione (GSH) monitored by 50  $\mu\text{mol L}^{-1}$  of NBT as shown in Figure S16.

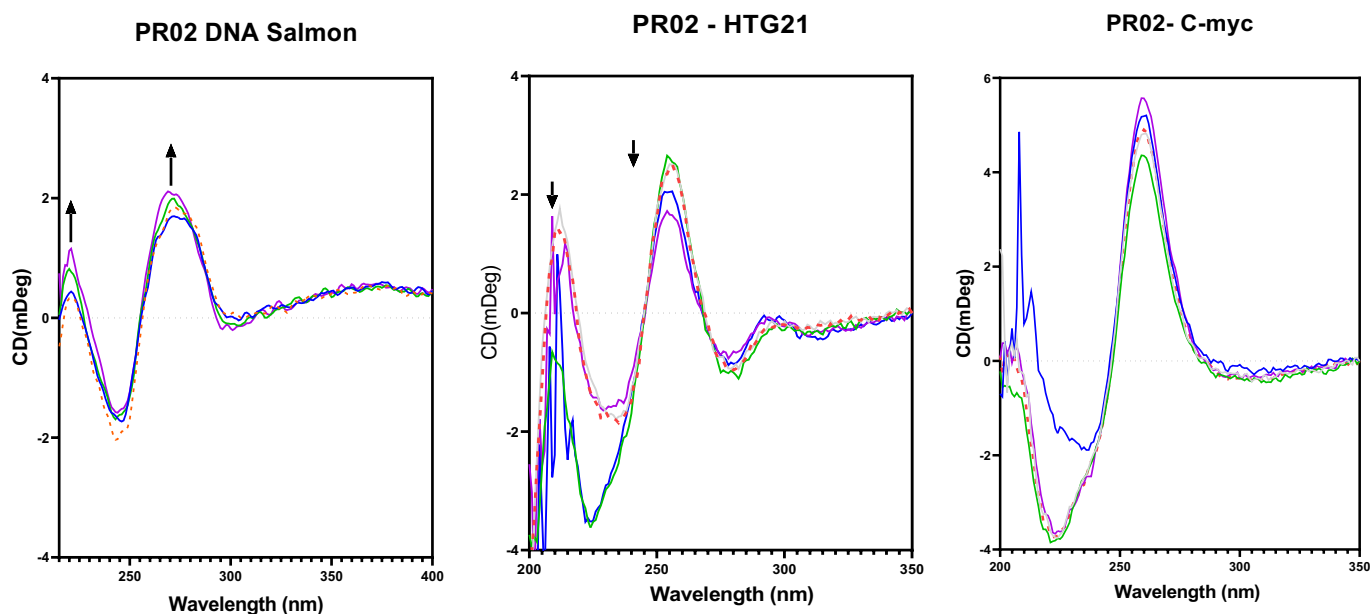

**Figure S18.** Circular dichroism of salmon DNA, G-quadruplexes DNAs 22AG and c-myc with **PR02** at concentrations from  $6.25 \mu\text{mol L}^{-1}$  up to  $50 \mu\text{mol L}^{-1}$ .

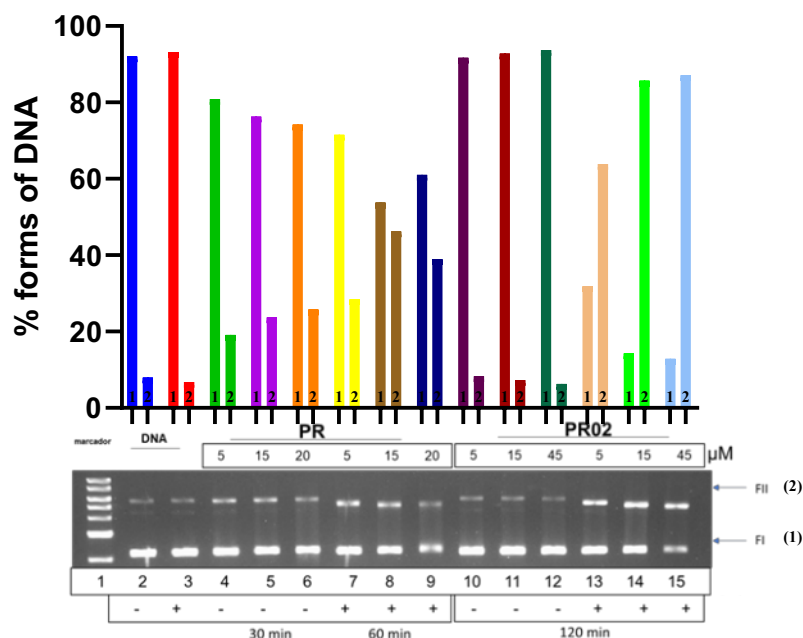

**Figure S19.** Photocleavage assay of pBR322 DNA ( $20 \mu\text{M}$ ) in the presence of **PR** and **PR02** complexes at different concentrations in the dark and after irradiation with blue light (LED,  $\lambda_{\text{max}} = 460 \text{ nm}$ ). Lane 1: Linear DNA marker (ladder). Lane 2: pBR322 DNA only in the dark and Lane 3: pBR322 DNA only with light. Lanes 4 -15: metal complexes + pBR322 DNA at concentrations of  $5, 15, 20$  and  $45 \mu\text{mol L}^{-1}$ . Lanes 7-9 and 13 to 15 were irradiated with blue LED, while others were kept in the dark.

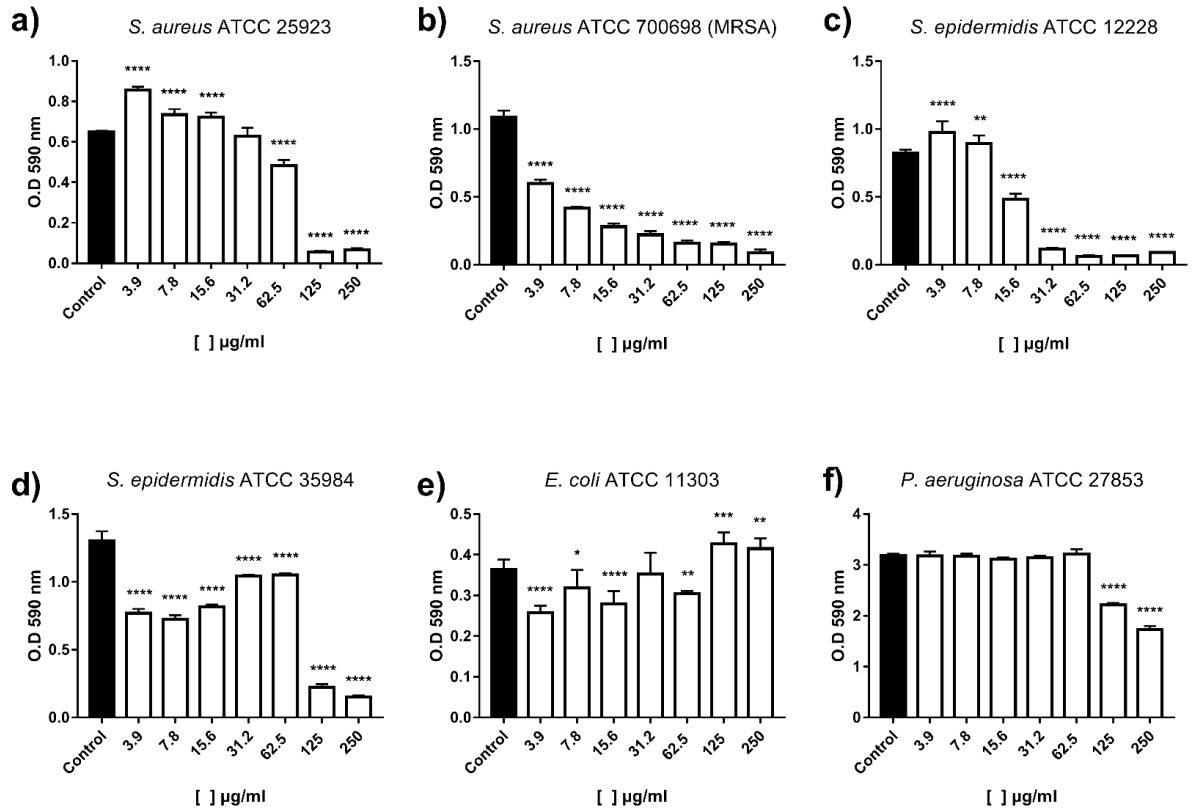

**Figure S20.** Effect of the PR complex on biofilm formation of *S. aureus*, *S. epidermidis*, *E. coli* and *P. aeruginosa*. Quantification of biomass of biofilms in formation (a to f). White bars represent bacteria treated with PR; black bars represent untreated bacteria. Error bars display SDs of the means. \* $p < 0.05$ , \*\* $p < 0.01$ , \*\*\* $p < 0.001$  and \*\*\*\* $p < 0.0001$  compared to untreated controls. Samples light irradiated ( $\lambda_{\max} = 463$  nm) for 1 h, followed incubation.



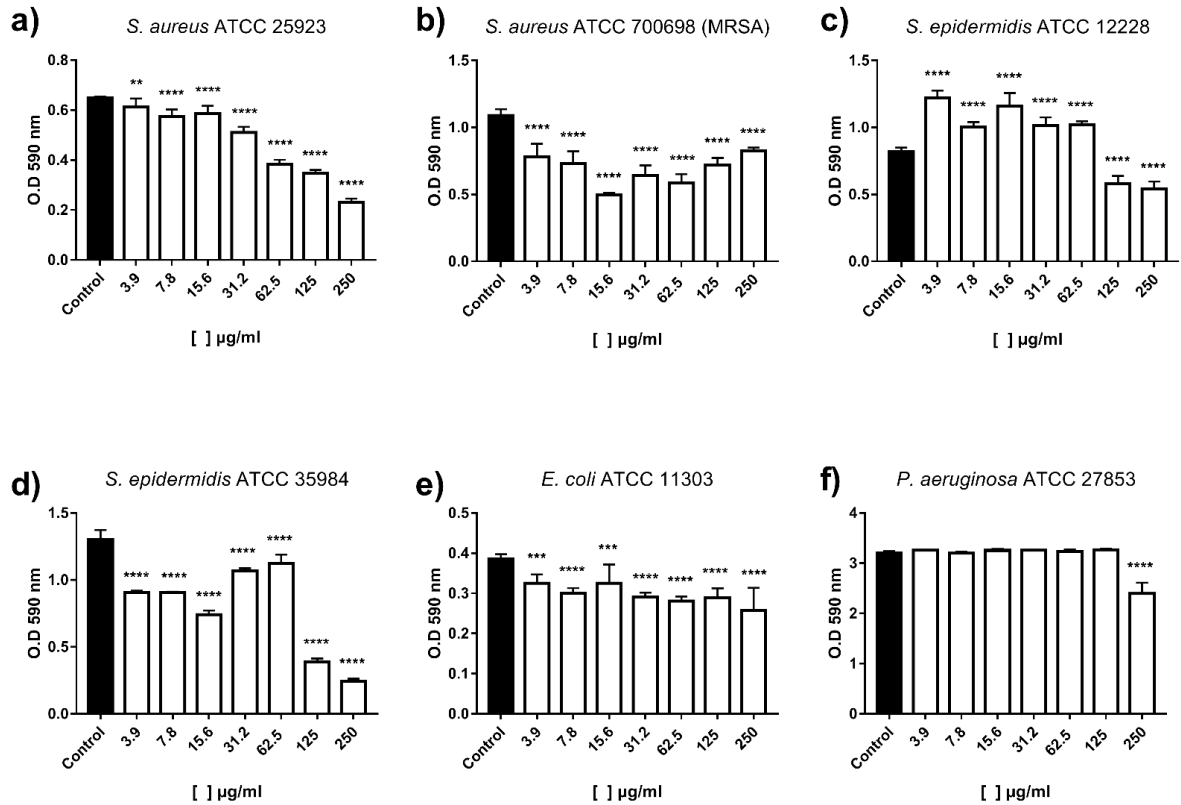

**Figure S21.** Effect of the PR01 complex on the biofilm formation of *S. aureus*, *S. epidermidis*, *E. coli* and *P. aeruginosa*. Quantification of biomass of biofilms in formation (a to f). White bars represent bacteria treated with PR01; black bars represent untreated bacteria. Error bars display SDs of the means. \* $p < 0.05$ , \*\* $p < 0.01$ , \*\*\* $p < 0.001$  and \*\*\*\* $p < 0.0001$  compared to untreated controls. Samples light irradiated ( $\lambda_{\max} = 463$  nm) for 1 h, followed incubation.

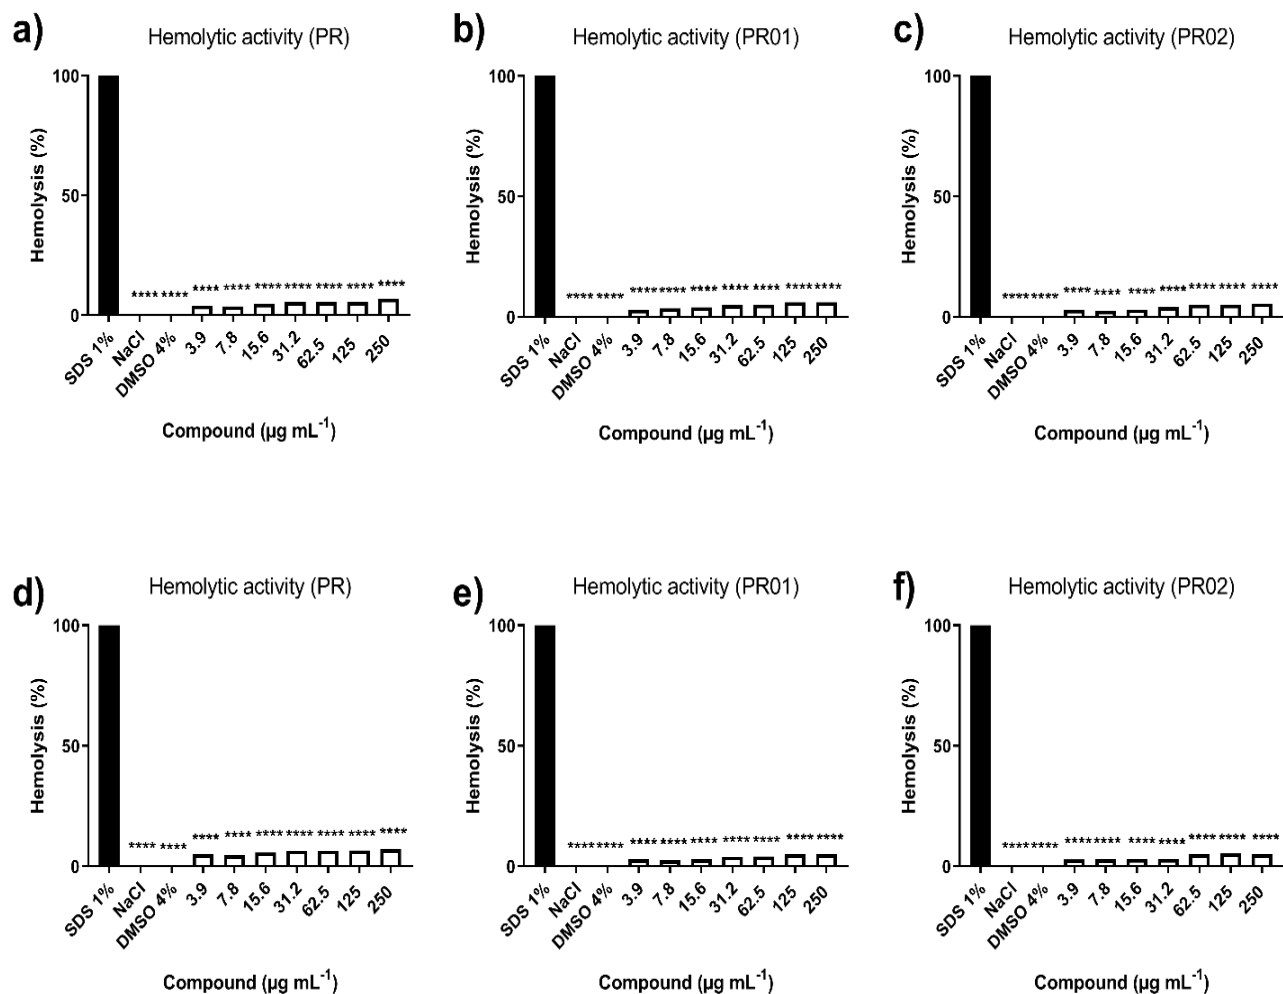

**Figure S22.** Hemolytic activity of **PR**, **PR01** and **PR02** ruthenium complexes without (a-c) and with light irradiation (d-e) ( $\lambda_{\text{max}} = 463 \text{ nm}$ ).

**Table S1.** Profile of Log P measurements

| <b>Ru complex</b>                                                           | <b>Log P</b> | <b>Reference</b> |
|-----------------------------------------------------------------------------|--------------|------------------|
| <b>(PR)</b> [Ru(bpy)(dppz)Cl <sub>2</sub> ]                                 | -0.26        | This work        |
| <b>(PR01)</b> Na[Ru(bpy)(dppz)SO <sub>3</sub> NO <sub>2</sub> ]             | 0.1          | This work        |
| <b>(PR02)</b> [Ru(bpy)(dppz)SO <sub>3</sub> NO](PF <sub>6</sub> )           | -0.17        | This work        |
| [Ru(bpy) <sub>2</sub> (dppz)]Cl <sub>2</sub>                                | -2.5         | <sup>5</sup>     |
| <i>cis</i> -[Ru(bpy) <sub>2</sub> (2-MIM)(NO <sub>2</sub> )]PF <sub>6</sub> | 1.29         | <sup>6</sup>     |

**Table S2.** Binding constant (K<sub>b</sub>) for similar ruthenium complexes

| <b>Ru complex</b>                                                 | <b>K<sub>b</sub></b>    | <b>Reference</b> |
|-------------------------------------------------------------------|-------------------------|------------------|
| <b>(PR)</b> [Ru(bpy)(dppz)Cl <sub>2</sub> ]                       | 6.90 x 10 <sup>4</sup>  | This work        |
| <b>(PR01)</b> Na[Ru(bpy)(dppz)SO <sub>3</sub> NO <sub>2</sub> ]   | 12.50 x 10 <sup>4</sup> | This work        |
| <b>(PR02)</b> [Ru(bpy)(dppz)SO <sub>3</sub> NO](PF <sub>6</sub> ) | 12.90 x 10 <sup>4</sup> | This work        |
| [Ru(bpy) <sub>2</sub> (dppz)]Cl <sub>2</sub>                      | 320 x 10 <sup>4</sup>   | <sup>7</sup>     |
| [Ru(phen) <sub>2</sub> (dppz)]Cl <sub>2</sub>                     | 210 x 10 <sup>4</sup>   | <sup>8</sup>     |
| [Ru(bpy) <sub>2</sub> (SO <sub>3</sub> )NO](PF <sub>6</sub> )     | 0.79 x 10 <sup>4</sup>  | <sup>9</sup>     |
| [Ru(bpy) <sub>2</sub> (SO <sub>3</sub> )H <sub>2</sub> O]         | 10.41 x 10 <sup>4</sup> | <sup>9</sup>     |

1. Silva, F. O. N.; Araújo, S. X. B.; Holanda, A. K. M.; Meyer, E.; Sales, F. A. M.; Diógenes, I. C. N.; Carvalho, I. M. M.; Moreira, Í. S.; Lopes, L. G. F., Synthesis, Characterization, and NO Release Study of the *cis*- and *trans*-[Ru(Bpy)<sub>2</sub>(SO<sub>3</sub>)(NO)]<sup>+</sup> Complexes. *European Journal of Inorganic Chemistry* **2006**, *2006* (10), 2020-2026.
2. Silva, C. D. S.; Paz, I. A.; Abreu, F. D.; de Sousa, A. P.; Verissimo, C. P.; Nascimento, N. R. F.; Paulo, T. F.; Zampieri, D.; Eberlin, M. N.; Gondim, A. C. S.; Andrade, L. C.; Carvalho, I. M. M.; Sousa, E. H. S.; Lopes, L. G. F., Thiocarbonyl-bound metallonitrosyl complexes with visible-light induced DNA cleavage and promising vasodilation activity. *J Inorg Biochem* **2018**, *182*, 83-91.
3. da Silva, C. D. S. P., I. A.; Sousa, E. H. S.; Lopes, L. G. F.; , 2024.
4. Gouveia, F. S.; Silveira, J. A. D.; Holanda, T. M.; Marinho, A. D.; Ridnour, L. A.; Wink, D. A.; de Siqueira, R. J. B.; Monteiro, H. S. A.; de Sousa, E. H. S.; Lopes, L. G. D., New nitrosyl ruthenium complexes with combined activities for multiple cardiovascular disorders. *Dalton Transactions* **2023**, *52* (16), 5176-5191.
5. Puckett, C. A.; Barton, J. K., Methods to explore cellular uptake of ruthenium complexes. *Journal of the American Chemical Society* **2007**, *129* (1), 46-47.
6. de Oliveira Neto, J.; Marinho, M. M.; Silveira, J. A. M.; Rocha, D. G.; Lima, N. C. B.; Gouveia Junior, F. S.; Lopes, L. G. F.; de Sousa, E. H. S.; Martins, A. M. C.; Marinho, A. D.; Jorge, R. J. B.; Monteiro, H. S. A., Synthesis and potential vasorelaxant effect of a novel ruthenium-based nitro complex. *J Inorg Biochem* **2022**, *228*, 111666.
7. Burya, S. J.; Lutterman, D. A.; Turro, C., Absence of quenching by [Fe(CN)<sub>6</sub>]<sup>4-</sup> is not proof of DNA intercalation. *Chem Commun (Camb)* **2011**, *47* (6), 1848-50.
8. Ambroise, A.; Maiya, B. G., Ruthenium(II) complexes of 6,7-dicyanodipyridoquinoxaline: Synthesis, luminescence studies, and DNA interaction. *Inorganic Chemistry* **2000**, *39* (19), 4264-4272.
9. Martins, P. H. R.; Romo, A. I. B.; da Silva, F. O. N.; Nascimento, O. R.; Rodriguez-Lopez, J.; Diogenes, I. C. N.; Lopes, L. G. F.; Sousa, E. H. S., Reactivity of a nitrosyl ruthenium complex and its potential impact on the fate of DNA - An in vitro investigation. *J Inorg Biochem* **2023**, *238*, 112052.
